# Supplementary material for: Epigallocatechin-3-Gallate Attenuates Leukocyte Infiltration in 67-kDa Laminin Receptor-Dependent and -Independent Pathways in the Rat Frontoparietal Cortex following Status Epilepticus
Source: MDPI journal article supplement (doi:10.3390/antiox12040969), 2023-04-20
Supplement: s1 [file s1]

## **Supplementary Information**

# **Epigallocatechin-3-gallate attenuates leukocyte infiltration in 67-kDa laminin receptor-dependent and -independent pathways in the rat frontoparietal cortex following status epilepticus**

Ji-Eun Kim,<sup>1</sup> Duk-Shin Lee,<sup>1</sup> Tae-Cheon Kang<sup>1,\*</sup>

<sup>1</sup>Department of Anatomy and Neurobiology, Institute of Epilepsy Research, College of Medicine, Hallym University, Chuncheon 24252, South Korea

\* Correspondence to: T. -C. Kang, Department of Anatomy and Neurobiology, College of Medicine, Hallym University, Chuncheon, Kangwon-Do 24252, South Korea; Tel: +82-33-248-2524; Fax: +82-33-248-2525; E-mail: [tkang@hallym.ac.kr](mailto:tkang@hallym.ac.kr)

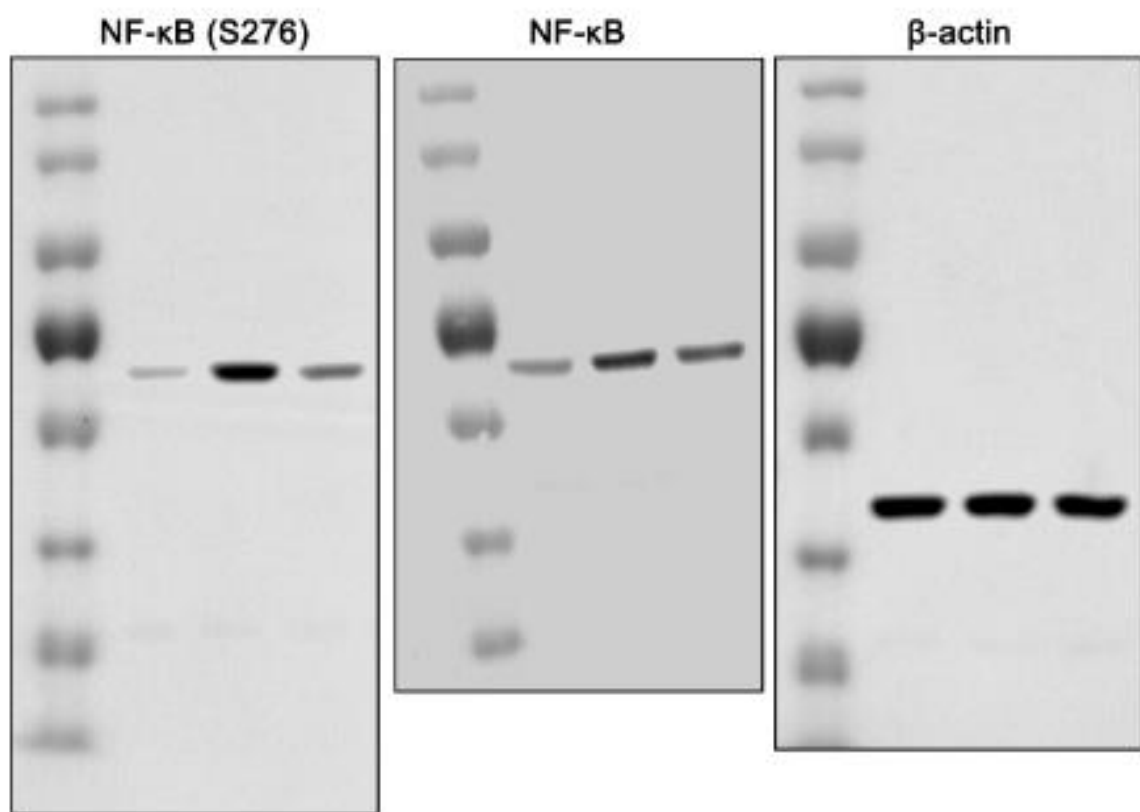

**Supplementary Figure S1.** Full-length gel images of Western blot data in Fig. 2E.
